# Supplementary material for: Negative Cooperativity between Gemin2 and RNA provides Insights into RNA Selection and the SMN Complex’s Release in snRNP Assembly
Source: bioRxiv or medRxiv preprint supplement (doi:10.1101/312124), 2019-11-14
Supplement: Supplementary file [file 312124-1.pdf]

## **SUPPLEMENTARY MATERIALS**

### **Negative Cooperativity between Gemin2 and RNA**

#### **Determines RNA Selection and Release of the SMN Complex in snRNP Assembly**

Hongfei Yi, Li Mu, Congcong Shen, Xi Kong, Yingzhi Wang, Yan Hou and Rundong Zhang\*

Containing

4 supplemental tables (Tables S1-4),

11 supplemental figures (Figures S1-11)

**Table S1. Data Collection and Refinement Statistics**

| <b>Variable protein components*</b>   |                                               |                                               |                                               |                                               |
|---------------------------------------|-----------------------------------------------|-----------------------------------------------|-----------------------------------------------|-----------------------------------------------|
|                                       | Complex A                                     | Complex B                                     | Complex C                                     | Previous                                      |
| Gemin2                                | FL(1-280)                                     | $\Delta$ N39 (40-280)                         | $\Delta$ N39 (40-280)                         | FL(1-280)                                     |
| SmD1                                  | $\Delta$ C(1-82)                              | $\Delta$ C(1-82)                              | $\Delta$ C(1-82)                              | FL(1-119)                                     |
| SmG                                   | Yes                                           | No                                            | Yes                                           | Yes                                           |
| <b>Data collection</b>                |                                               |                                               |                                               |                                               |
| Wavelength (Å)                        | 0.97853                                       | 0.97853                                       | 0.97853                                       | 0.99993                                       |
| Space group                           | P2 <sub>1</sub> 2 <sub>1</sub> 2 <sub>1</sub> | P2 <sub>1</sub> 2 <sub>1</sub> 2 <sub>1</sub> | P2 <sub>1</sub> 2 <sub>1</sub> 2 <sub>1</sub> | P2 <sub>1</sub> 2 <sub>1</sub> 2 <sub>1</sub> |
| Unit cell (Å):                        | 83.32,                                        | 83.17,                                        | 82.96,                                        | 82.83,                                        |
| a, b, c                               | 115.76,                                       | 114.09,                                       | 114.12,                                       | 84.60,                                        |
|                                       | 128.21                                        | 125.39                                        | 130.14                                        | 104.66                                        |
| Highest resolution (Å) <sup>§</sup> : |                                               |                                               |                                               |                                               |
| a*, b*, and c*                        | 3.3, 3.5, 3.9                                 | 3.4, 3.4, 4.0                                 | 3.1, 3.2, 3.6                                 | 2.4, 3.2, 2.6                                 |
| Unique reflections                    | 15470                                         | 14569                                         | 18768                                         | 19831                                         |
| Completeness (%)                      | 98.2 (94.6) <sup>a</sup>                      | 99.5(97.9) <sup>c</sup>                       | 97.8(95.2) <sup>b</sup>                       | 99.3(98.6) <sup>d</sup>                       |
|                                       | 79.2(15.9) <sup>e</sup>                       | 84.2(35.5) <sup>g</sup>                       | 83.1(28.8) <sup>f</sup>                       | 76.0(20.0) <sup>h</sup>                       |
| R <sub>meas</sub>                     | 0.154 (0.905)                                 | 0.233(0.914)                                  | 0.166(0.885)                                  |                                               |
| R <sub>pim</sub>                      | 0.048 (0.261)                                 | 0.087(0.297)                                  | 0.056(0.243)                                  |                                               |
| Mean I/σ                              | 13.6 (2.2)                                    | 12.9(2.0)                                     | 10.4(2.0)                                     | 13.7(3.8)                                     |
| Redundancy                            | 12.4 (12.3)                                   | 10.8 (8.7)                                    | 12.4(12.7)                                    | 6.3 (3.8)                                     |
| <b>Refinement Statistics</b>          |                                               |                                               |                                               |                                               |
| Resolution range(Å)                   | 48-3.3                                        | 47-3.4                                        | 47-3.1                                        | 40-2.5                                        |
| R factor (%)                          | 20.5                                          | 19.1                                          | 17.2                                          | 22.4                                          |
| R <sub>free</sub> factor (%)          | 26.5                                          | 24.5                                          | 24.0                                          | 29.7                                          |
| Number of reflections                 | 15470                                         | 14569                                         | 18768                                         | 19831                                         |
| Number of atoms                       | 4793                                          | 4346                                          | 4890                                          | 4826                                          |
| Rmsd bond length (Å)                  | 0.0112                                        | 0.0122                                        | 0.0129                                        | 0.0130                                        |
| Rmsd bond angles (°)                  | 1.576                                         | 1.624                                         | 1.477                                         | 1.579                                         |
| Ramachandran plot (%) <sup>#</sup> :  |                                               |                                               |                                               |                                               |
| Favored,                              | 93.9,                                         | 91.6,                                         | 94.7,                                         | 96.4,                                         |
| additional allowed,                   | 5.9,                                          | 7.5,                                          | 4.6,                                          | 3.0,                                          |
| disallowed                            | 0.2                                           | 0.9                                           | 0.7                                           | 0.6                                           |
| PDB code                              | 5XJQ                                          | 5XJS                                          | 5XJR                                          | 5XJL                                          |

\* Complexes A-C and the previous 7S complex all contain SMN(residues 26-62), SmD2, SmF and SmE.

<sup>§</sup> Ellipsoidal truncation was performed on each data set due to serious anisotropic diffraction.

<sup>a-d</sup> For resolution range of 48-3.9, 47-3.6, 47-4.0 and 40-3.2 Å respectively. The number in the parenthesis corresponds to the highest-resolution shell of 4.04-3.90, 3.72-3.60, 4.12-4.00 and 3.35-3.20 Å respectively.

<sup>e-h</sup> For resolution range of 48-3.3, 47-3.1, 47-3.4 and 40-2.5 Å respectively. The number in the parenthesis corresponds to the highest-resolution shell of 3.4-3.3, 3.2-3.1, 3.52-3.40 and 2.62-2.50 Å respectively.

<sup>#</sup> gained from Coot program.

**Table S2. RNA sequences used in this study.**

| Name            | RNA sequence                                                                                                                                                              |
|-----------------|---------------------------------------------------------------------------------------------------------------------------------------------------------------------------|
| 9nt             | AAUUUUUGA                                                                                                                                                                 |
| 3'Sm            | GGGAAUUGAAAACUUUUCCCAAUACCCC <b>AAUUUUUGA</b>                                                                                                                             |
| U4              | GGGAAUUGAAAACUUUUCCCAAUACCCCGCCGUGACGACUUGCAAUAU<br>AGUCGGCACUGGC <b>AAUUUUUGA</b> CAGUCUCUACGGAGACUG                                                                     |
| U4ΔSm           | GGGAAUUGAAAACUUUUCCCAAUACCCCGCCGUGACGACUUGCAAUAU<br>AGTCGGCACUGGC <b>AACCCCGA</b> CAGUCUCUACGGAGACUG                                                                      |
| U4-3'ss         | GGGAAUUGAAAACUUUUCCCAAUACCCCGCCGUGACGACUUGCAAUAU<br>AGUCGGCACUGGC <b>AAUUUUUGA</b> CAGUCUCUACGCUCUGAC                                                                     |
| U4-3'Δ          | GGGAAUUGAAAACUUUUCCCAAUACCCCGCCGUGACGACUUGCAAUAU<br>AGUCGGCACUGGC <b>AAUUUUUGAC</b>                                                                                       |
| U4-5'ss         | GGGAAUUGAAAACUUUUCCCAAUACCCC <b>AAUUUUUGA</b> CAGUCUCUACG<br>GAGACUG                                                                                                      |
| U4-5'Δ          | GGC <b>AAUUUUUGA</b> CAGUCUCUACGGAGACUG                                                                                                                                   |
| U4-5'Δ-3'ss     | GGC <b>AAUUUUUGA</b> CAGUCUCUACGCUCUGAC                                                                                                                                   |
| fU4             | GGGCAGCUUUGCGCAGUGGCAGUAUCGUAGCCAAUGAGGUCUAUCCGA<br>GGCGCGAUUAUUGCUAAUUGAAAACUUUUCCCAAUACCCCGCCGUGAC<br>GACUUGCAAUAUAGUCGGCACUGGC <b>AAUUUUUGA</b> CAGUCUCUACGGAG<br>ACUG |
| fU4ΔSm          | GGGCAGCUUUGCGCAGUGGCAGUAUCGUAGCCAAUGAGGUCUAUCCGA<br>GGCGCGAUUAUUGCUAAUUGAAAACUUUUCCCAAUACCCCGCCGUGAC<br>GACUUGCAAUAUAGUCGGCACUGGC <b>AACCCCGA</b> CAGUCUCUACGGAG<br>ACUG  |
| fU4-spacer      | GGGCAGCUUUGCGCAGUGGCAGUAUCGUAGCCAAUGAGGUCUAUCCGA<br>GGCGCGAUUAUUGCUAAUUGAAAACUUUUCCCAAUACCCCGCCGUGAC<br>GACUUGCAAUAUAGUCGGCACU <b>CCGAAUUUUUGA</b> CAGUCUCUACGGAG<br>ACUG |
| fU4-spacer-3'ss | GGGCAGCUUUGCGCAGUGGCAGUAUCGUAGCCAAUGAGGUCUAUCCGA<br>GGCGCGAUUAUUGCUAAUUGAAAACUUUUCCCAAUACCCCGCCGUGAC<br>GACUUGCAAUAUAGUCGGCACU <b>CCGAAUUUUUGA</b> CAGUCUCUACGCUC<br>UGAC |

Red, Sm site. Blue, ΔSm. Cyan, spacer.

**Table S3. The components and amounts used for gel filtration chromatographic (GFC) assay.**

| <b>Input components (RNA colored in blue)</b>                          | <b>Amount used (molar ratio in last brackets)</b> |
|------------------------------------------------------------------------|---------------------------------------------------|
| D1s/D2 + F/E/G (5Sm)                                                   | 200μg + 200μg (1:1)                               |
| Gemin2ΔN39                                                             | 200μg                                             |
| F/E/G                                                                  | 1mg                                               |
| 3'Sm                                                                   | 10μg                                              |
| 5Sm + 3'Sm                                                             | 400μg + 100μg (1:1)                               |
| 5Sm + 9nt                                                              | 400μg + 120μg (about 1:5)                         |
| Gemin2ΔN39/SMN <sub>Ge2BD</sub> + D1s/D2 + F/E/G<br>(7SΔN preparation) | 0.6mg + 1mg + 1mg (1:2:2)                         |
| 7SΔN + 3'Sm                                                            | 160μg + 40μg (about 1:1.5)                        |
| 7SΔN + U4                                                              | 160μg + 60μg (1:1)                                |
| (7SΔN + D3/B) + U4                                                     | (160μg + 60μg) + 60μg (1:1.5:1)                   |
| 7SΔN + U4ΔSm                                                           | 160μg + 60μg (1:1)                                |
| 7SΔN + U4-3'Δ                                                          | 160μg + 50μg (1:1)                                |
| 7SΔN + U4-5'Δ                                                          | 160μg + 40μg (1:2)                                |
| U4-5'Δ                                                                 | 5μg                                               |
| 7SΔN + U4-3'ss                                                         | 160μg + 60μg (1:1)                                |
| 7SΔN + U4-5'ss                                                         | 160μg + 40μg (1:1)                                |
| 7SΔN + U4-5'Δ-3'ss                                                     | 80μg + 40μg (1:4)                                 |
| 7SΔN + U4-5'Δ-3'ss + U4-5'Δ                                            | 80μg + 15μg + 15μg (1:1.5:1.5)                    |
| 5Sm + U4-5'Δ                                                           | 400μg + 40μg (2:1)                                |
| 5Sm + U4-5'ss                                                          | 400μg + 80μg (2:1)                                |
| fIU4                                                                   | 10μg                                              |
| 7SΔN + fIU4                                                            | 120μg + 120μg (1:1.6)                             |
| 7SΔN + fIU4ΔSm                                                         | 100μg + 100μg (1:1.6)                             |
| 7SΔN + fIU4-spacer                                                     | 120μg + 120μg (1:1.6)                             |
| 7SΔN + fIU4-spacer-3'ss                                                | 80μg + 80μg (1:1.6)                               |
| (7SΔN + D3/B) + fIU4                                                   | (120μg + 60μg) + 120μg (1:1.5:1.6)                |
| (7SΔN + D3/B) + fIU4-spacer-3'ss                                       | (80μg + 40μg) + 80μg (1:2:1.6)                    |
| 7SΔN + (fIU4-spacer + U4-5'Δ-3'ss)                                     | 80μg + (80μg + 16μg) (1:1.6:1.6)                  |
| 7SΔN + (fIU4-spacer-3'ss + U4-5'Δ)                                     | 80μg + (80μg + 16μg) (1:1.6:1.6)                  |
| (7SΔN + D3/B) + (fIU4-spacer-3'ss + U4-5'Δ)                            | (80μg + 40μg) + (80μg + 16μg) (1:2:1.6:1.6)       |
| (7SΔN + D3/B) + (fIU4 + U4-5'Δ)                                        | (100μg + 50μg) + (100μg + 20μg) (1:2:1.6:1.6)     |

**Table S4. The GFC elution positions of the RNAs, proteins, and their complexes studied.**

| Components                      | Elution position (ml)           | +7SΔN39: Elution position (ml) | +5Sm: Elution position (ml) | +7Sm: Elution position (ml) |
|---------------------------------|---------------------------------|--------------------------------|-----------------------------|-----------------------------|
| 9nt                             | ~19.6                           | Not formed                     | 14.37                       | Not tested                  |
| 3'Sm                            | 16.64                           | Not formed                     | 13.51                       | Not tested                  |
| U4                              | 14.75                           | 13.31                          | Not tested                  | 13.43                       |
| U4ΔSm                           | 14.91                           | Not formed                     | Not tested                  | Not tested                  |
| U4-3'ss                         | 14.48                           | 13.11                          | Not tested                  | Not tested                  |
| U4-3'Δ                          | 15.66                           | Not formed                     | Not tested                  | Not tested                  |
| U4-5'ss                         | 15.67                           | 13.65(RNA+5Sm)                 | 13.50                       | Not tested                  |
| U4-5'Δ                          | 17.48                           | 14.29(RNA+5Sm)                 | 14.27                       | Not tested                  |
| U4-5'Δ-3'ss                     | 16.62                           | 13.97                          | Not tested                  | Not tested                  |
| flU4                            | 13.08                           | 12.26                          | Not tested                  | 12.31                       |
| flU4ΔSm                         | 12.93                           | Not formed                     | Not tested                  | Not tested                  |
| flU4-spacer                     | 12.97                           | 12.24(RNA+5Sm)                 | Not tested                  | Not tested                  |
| flU4-spacer-3'ss                | 12.90                           | ~12.11                         | Not tested                  | 12.14                       |
| 7SΔN39                          | 13.78                           | -----                          | -----                       | -----                       |
| 7S                              | 13.61                           | -----                          | -----                       | -----                       |
| D1s/D2                          | ~16.5                           | -----                          | -----                       | -----                       |
| F/E/G                           | 14.29(dimer),<br>16.62(monomer) | -----                          | -----                       | -----                       |
| D1s/D2/F/E/G(5Sm)               | 15.06                           | -----                          | -----                       | -----                       |
| Gemin2ΔN39/SMN <sub>Ge2BD</sub> | 15.66                           | -----                          | -----                       | -----                       |

5Sm indicates D1s/D2 and F/E/G. 7Sm indicates 5Sm and D3(1-75)/B(1-91).

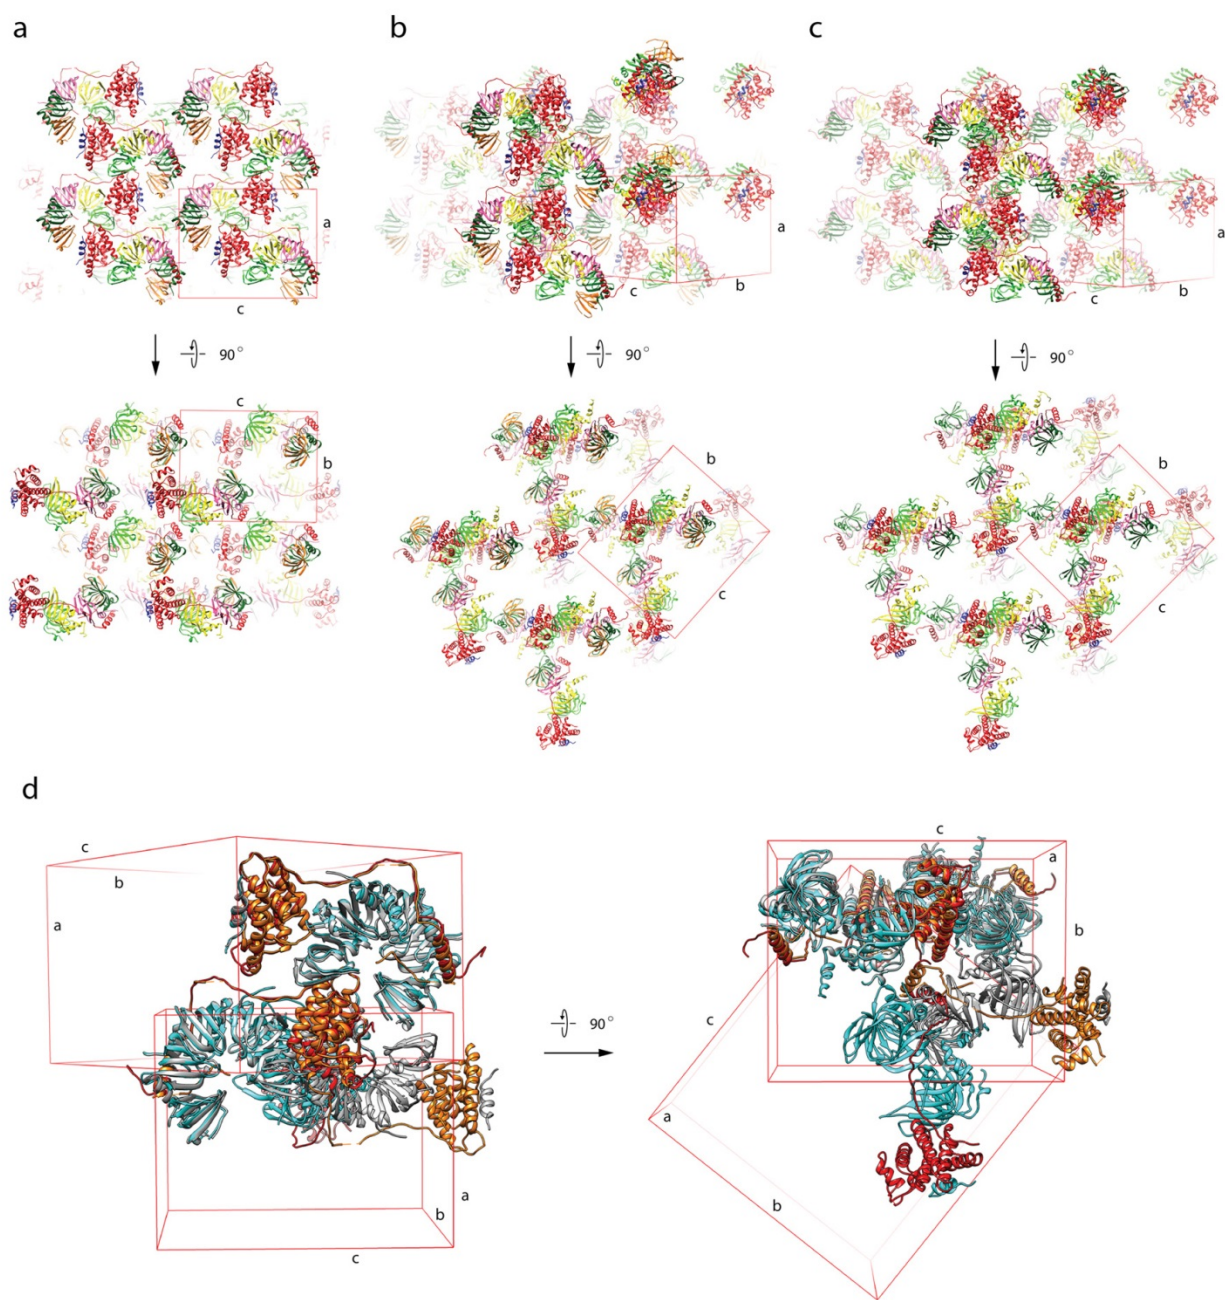

**Fig. S1. Crystal packing comparison of three complexes.** Two views of the crystal packing for each of 3 complexes: (a) the 7S complex from the previous study (3S6N), (b) Complex A and (c) Complex C. The five Sm proteins, D1, D2, F, E and G are colored in green, lemon, pink, dark green and orange respectively. Gemin2 and SMN<sub>Ge2BD</sub> are colored in red and blue respectively. Unit cells and axis are showed. (d) Comparison of 3S6N (5Sm in light gray and Gemin2 in orange) with Complex A (5Sm in cyan and Gemin2 in red) in crystal packing. Two molecules of the complexes are superimposed in direction a.

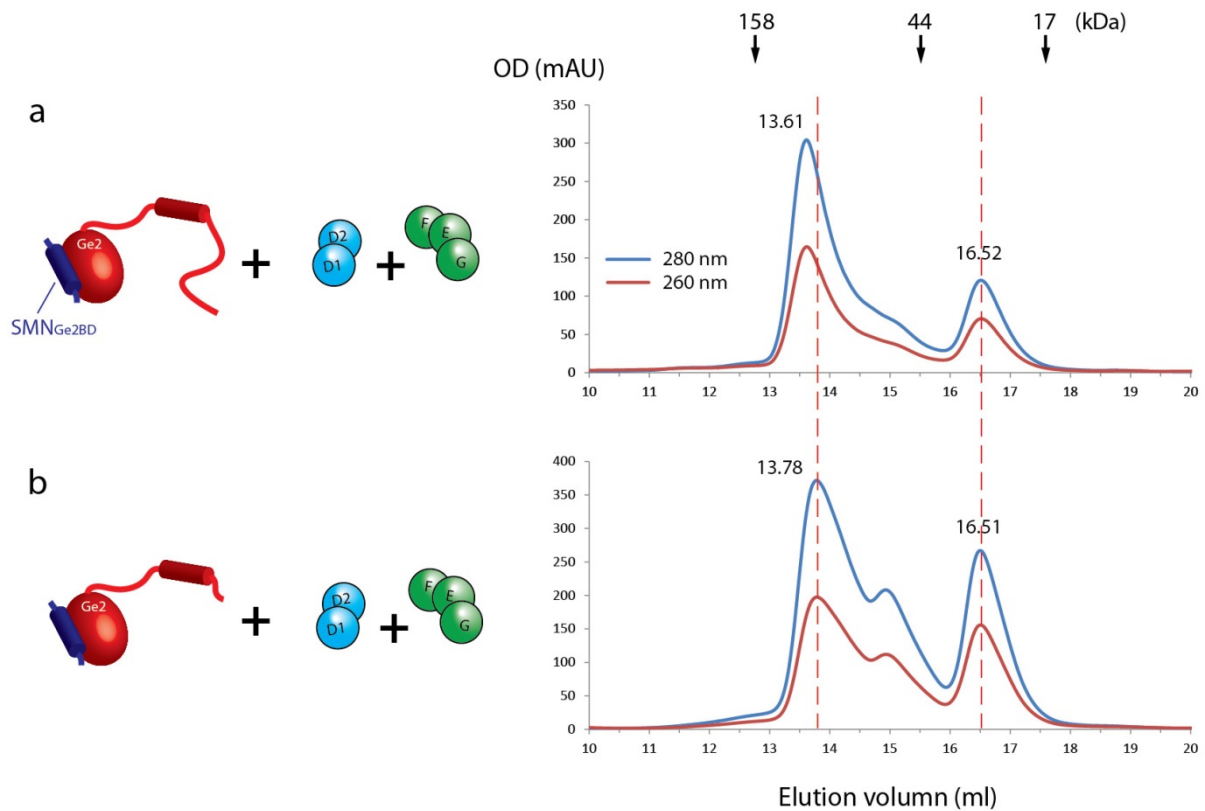

**Fig. S2. The gel filtration profiles of 7S and 7SΔN39.** Reconstitution of 7S or 7SΔN39 was made by mixing the 5 Sm proteins, D1s/D2 and F/E/G, with (a) Gemin2/SMNGe2BD or (b) Gemin2ΔN39/SMNGe2BD respectively followed by gel filtration chromatography separation (right panels). The input components are showed in cartoon (left panels). The positions of standard proteins are indicated at the top. Peak positions (ml) are indicated.



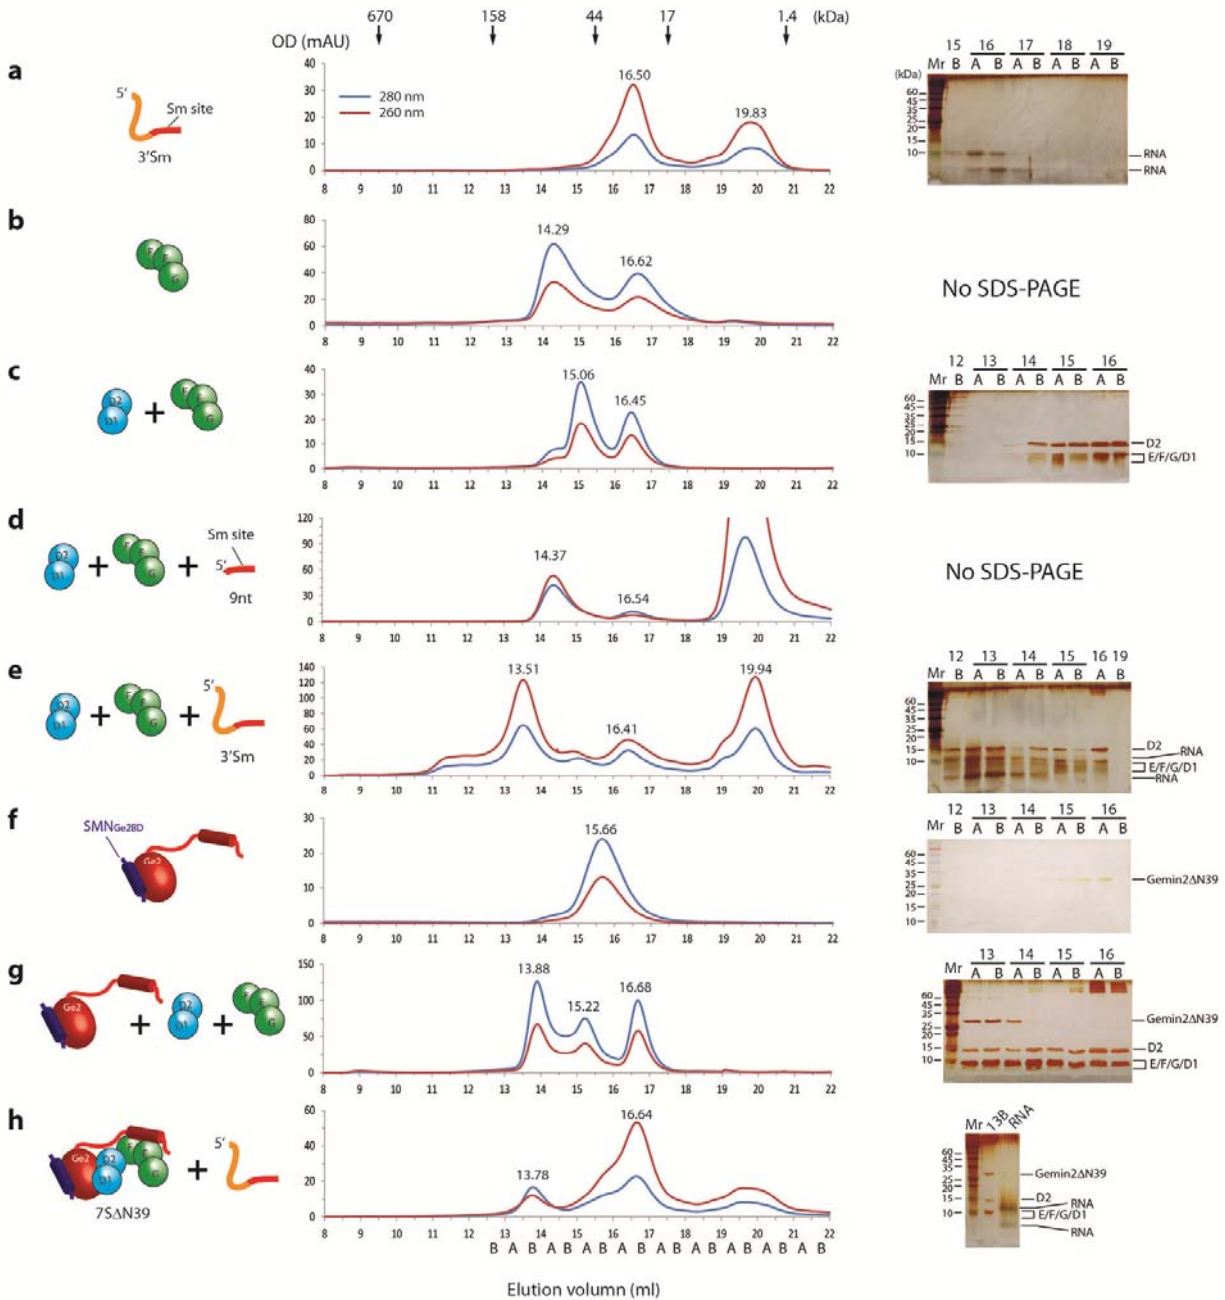

**Fig. S3. The 7SΔN39 complex cannot bind RNA containing solely a Sm site at 3' end.** Individual RNA containing Sm site at its 3' end, 3'Sm (a), SmF/E/G (b), mixture of SmD1/D2 and SmF/E/G (c), mixture of 9nt and the 5 Sm proteins (d), mixture of 3'Sm and the 5 Sm proteins (e), individual Gemin2ΔN39 (f), mixture of Gemin2ΔN39 and the 5 Sm proteins (g) or mixture of reconstituted 7SΔN39 and 3'Sm (h) was separated by gel filtration chromatography (middle panels) and individual fractions were analyzed by SDS-PAGE and silver staining (right panels). The input components are showed in cartoon (left panels). The positions of standard proteins are indicated at the top. Fractions (A & B) are named on the basis of volume positions (bottom). Peak positions (ml) are indicated. There were two oligomeric forms of F/E/G, monomer (16.45 ml) and dimer (15.06 ml) in Panel (b).



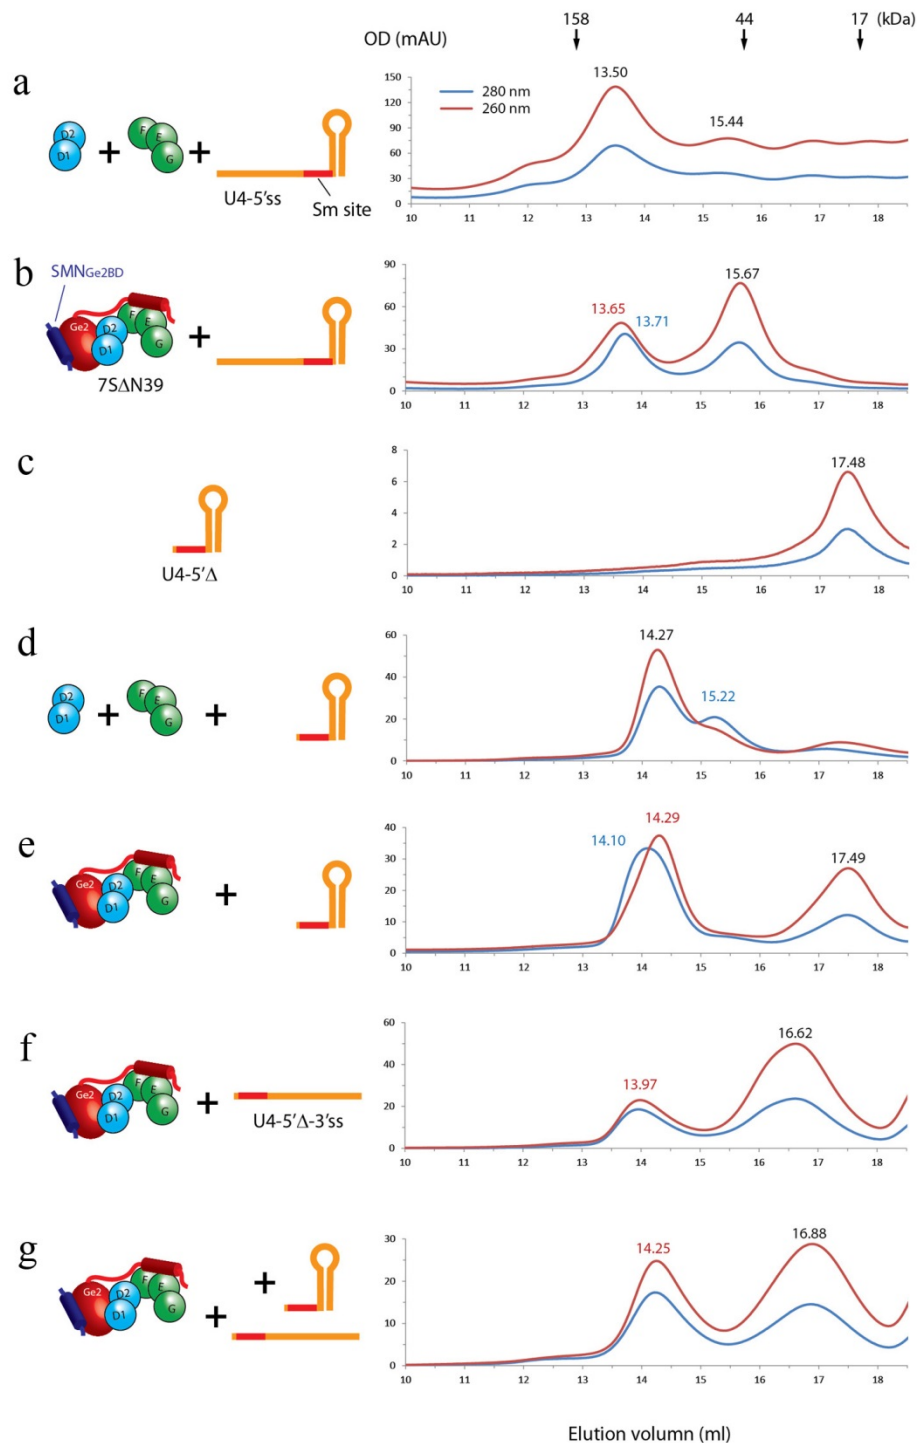

**Fig. S4. The gel filtration profiles of RNA and Sm subcore formation.** Mixture of 5Sm and U4-5'ss (a), mixture of 7SΔN39 and U4-5'ss (b), U4-5'Δ alone (c), mixture of 5Sm and U4-5'Δ (d), mixture of 7SΔN39 and U4-5'Δ (e), mixture of 7SΔN39 and U4-5'Δ-3'ss (f), or mixture of 7SΔN39 and equal molar amount of U4-5'Δ and U4-5'Δ-3'ss (g) was separated by gel filtration chromatography (right panels). (b) and (e) are the same as in Fig. 2 and are showed here for easy comparison. The input components are showed in cartoon (left panels). The positions of standard proteins are indicated at the top. Precise peak positions (ml) are indicated.

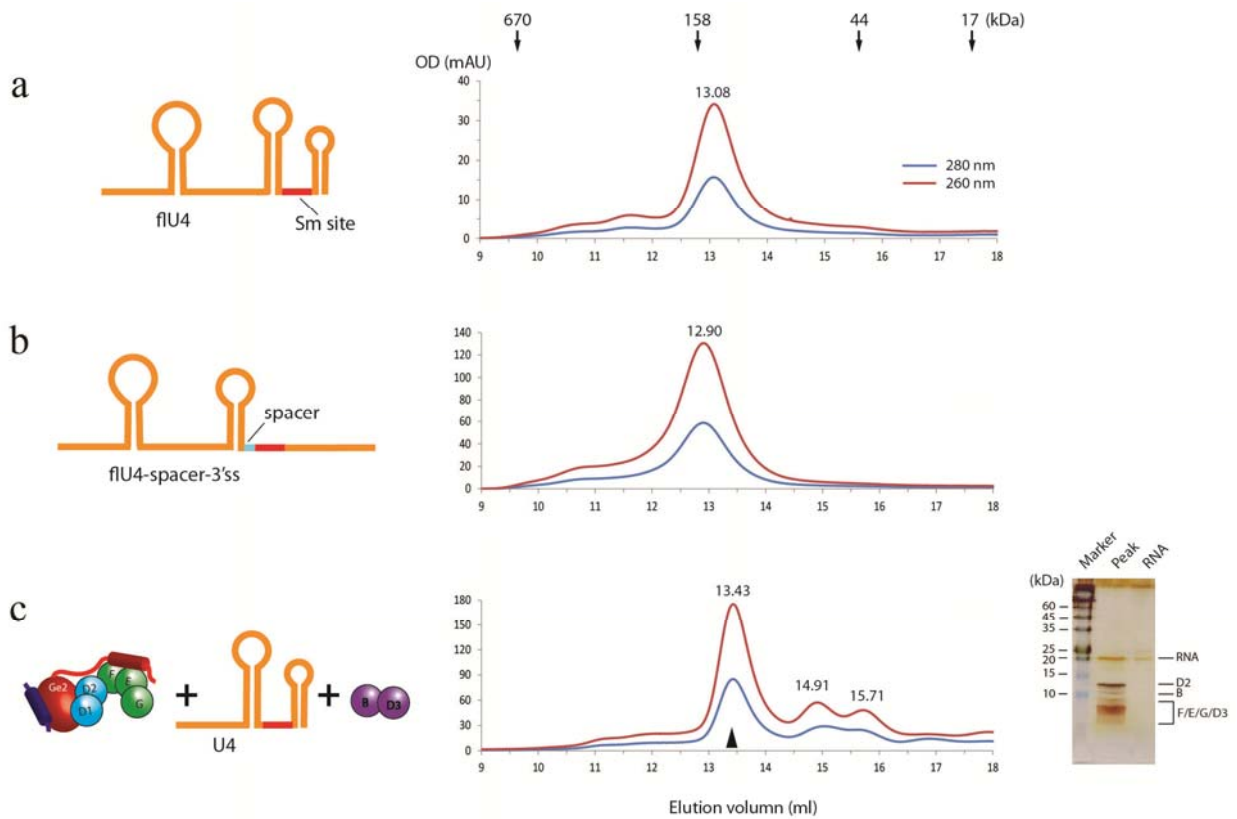

**Fig. S5. The gel filtration profiles of flU4, flU4-spacer-3'ss and Sm core assembly of U4.** flU4 (a) or flU4-spacer-3'ss (b) was separated by gel filtration chromatography (right panels). (c) Mixture of 7SΔN39, D3/B and U4 snRNA after incubation was separated by GFC (middle panel) and the peak (solid arrow head) and input RNA were subjected to SDS-PAGE followed by silver staining (right panel). Input components are showed in cartoon (left panels). The positions of standard proteins are indicated at the top. Precise peak positions (ml) are indicated.

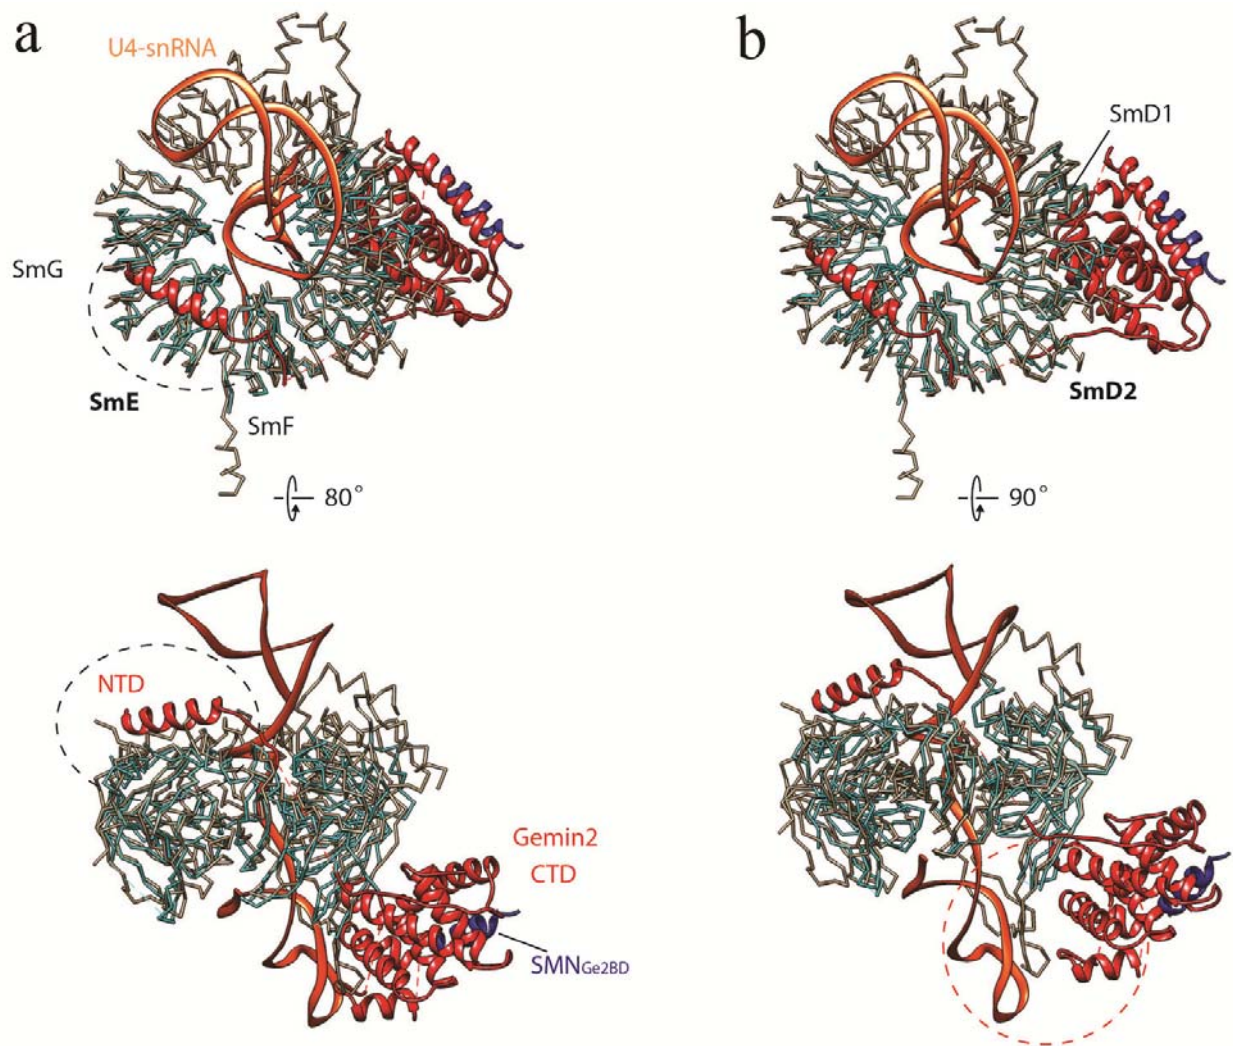

**Fig. S6. The bindings of Gemin2 and U4 snRNA to 5Sm are compatible sterically.** Superposition of SmE (a) or SmD2 (b) of the 7SΔN39 complex with that of U4 snRNP core (PDB code 4WZJ) reveals that Gemin2 is compatible with U4 snRNA in binding to 5Sm spatially. The five Sm proteins in the 7SΔN39 complex are colored in cyan, and in the U4 snRNP core in grey. SMN<sub>Ge2BD</sub> and Gemin2 are colored in blue and red respectively. U4 snRNA is colored in orange.

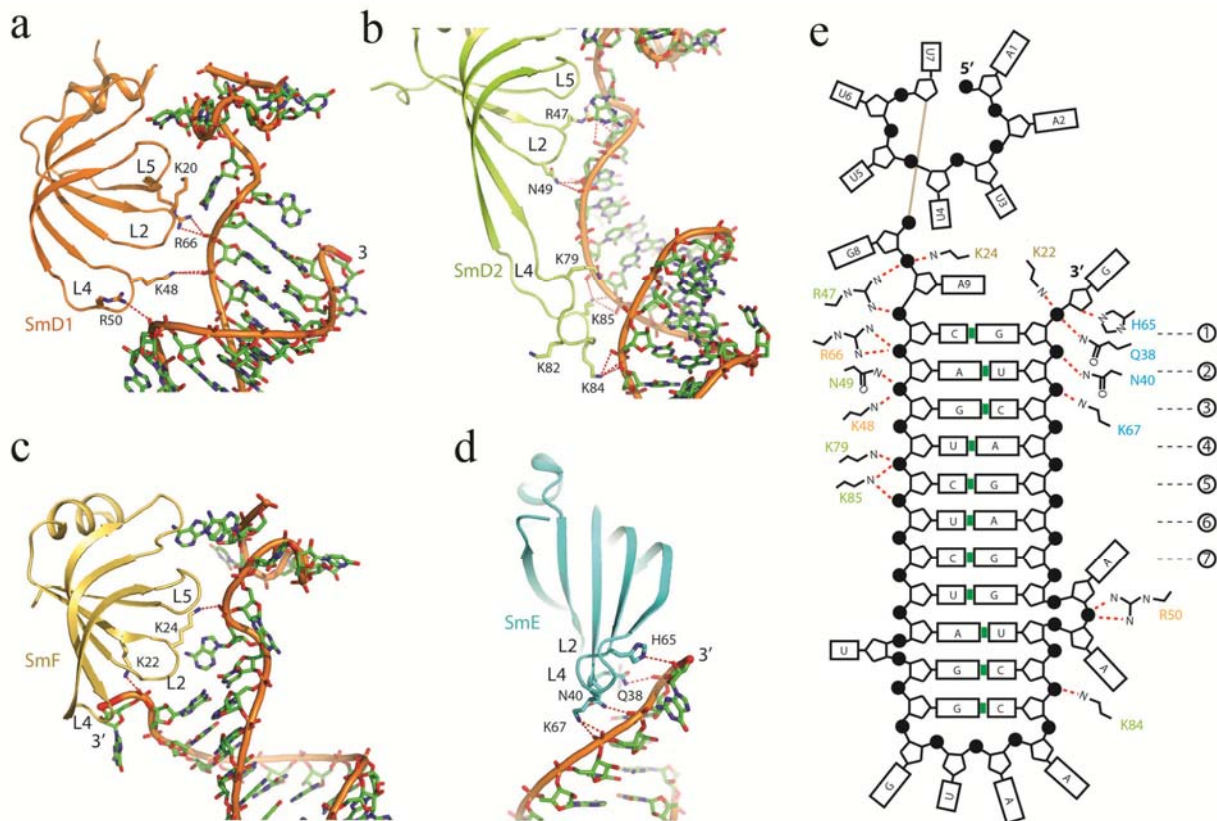

**Fig. S7. Detailed interactions between the 3'-SL of U4 RNA and the Sm proteins.** (a-d) Detailed interactions between each Sm protein and RNA 3'-SL (PDB code 4WZJ). (e) Schematic summary of the interactions between Sm proteins and RNA 3'-SL.



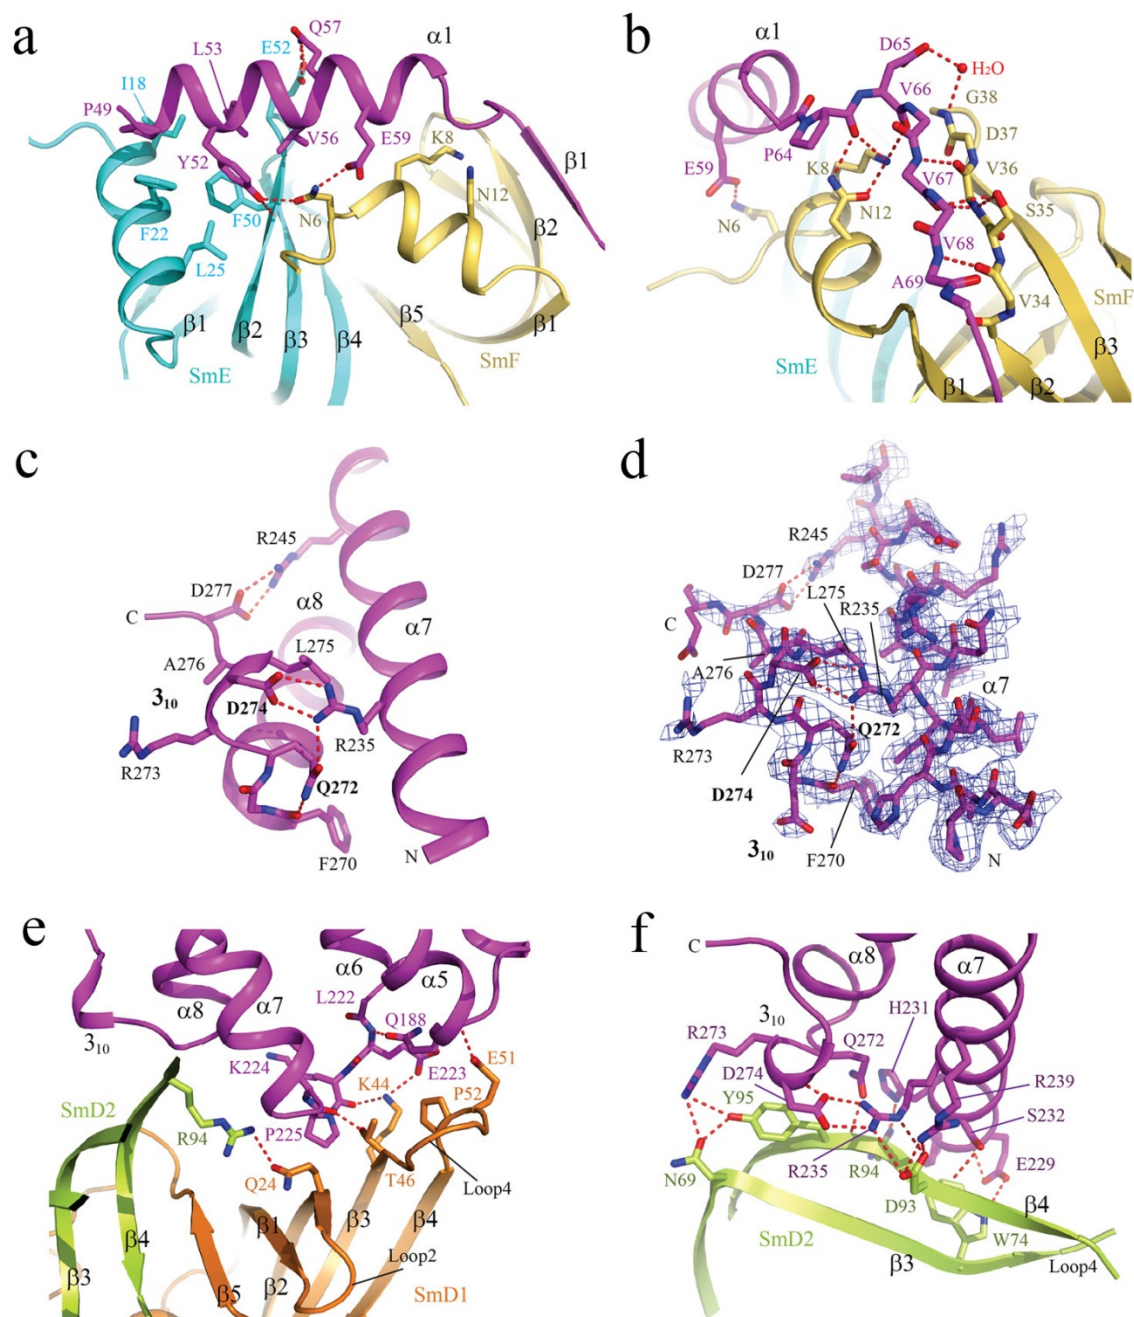

**Fig. S8. Detailed views of interactions between Gemin2 and Sm proteins.** (a-b) Gemin2's NTD interacts with SmF/E. (c-d) the C-terminal  $3_{10}$  helix of Gemin2 and its interactions with helices  $\alpha 7$ -8. SigmaA-weighted 2Fo-Fc electron density maps (blue meshes) are contoured at  $1.1\sigma$  in (D). (e-f) Gemin2's CTD interacts with SmD1/D2. Hydrogen bonds and salt bridges are shown as red dashed lines. The five Sm proteins, D1, D2, F, E and G, are colored in orange, lemon, yellow, cyan and green respectively. Gemin2 and SMN<sub>Ge2BD</sub> are colored in purple and blue respectively. Oxygen and nitrogen are colored in red and blue respectively. Water is shown in red sphere.

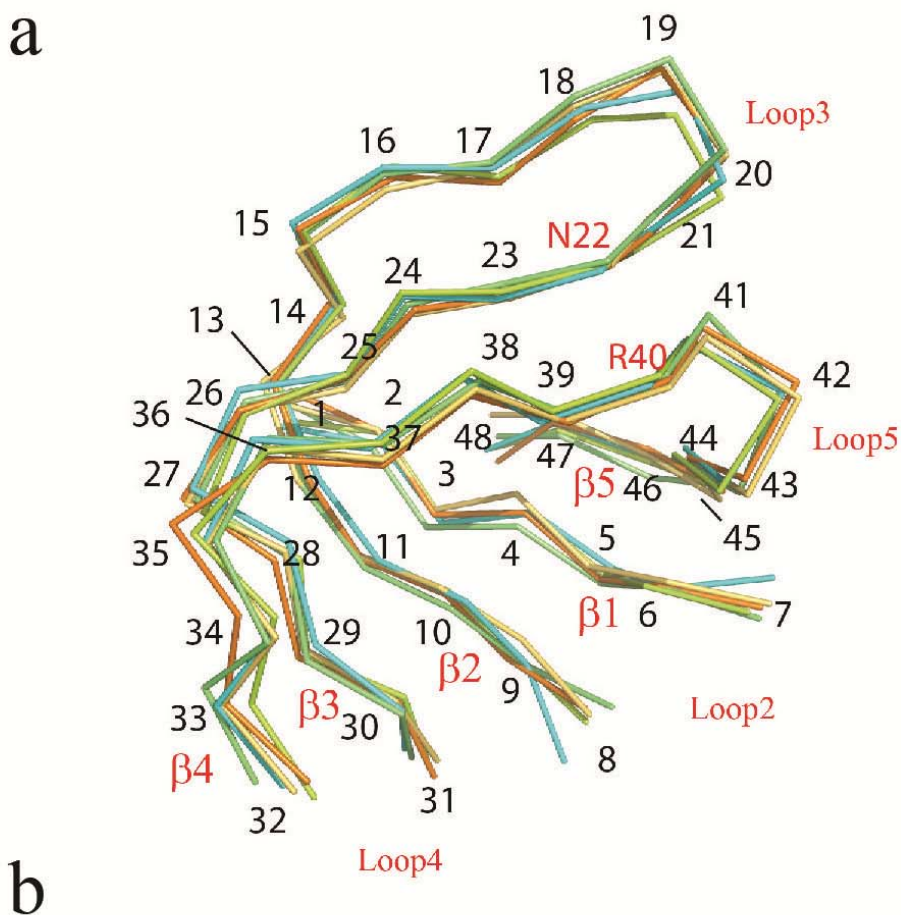

**Fig. S9. Conformational changes of 5Sm from the 7S intermediate state to assembled Sm cores.** (a) The Sm fold defined by 48 residues of each Sm protein used for superposition and analysis. Numbering residues in this system is shown at each position. (b) Position differences of each pair of Sm proteins in the 7S complex and U1 Sm core when one pair is superposed using the 48-residue Sm fold system.

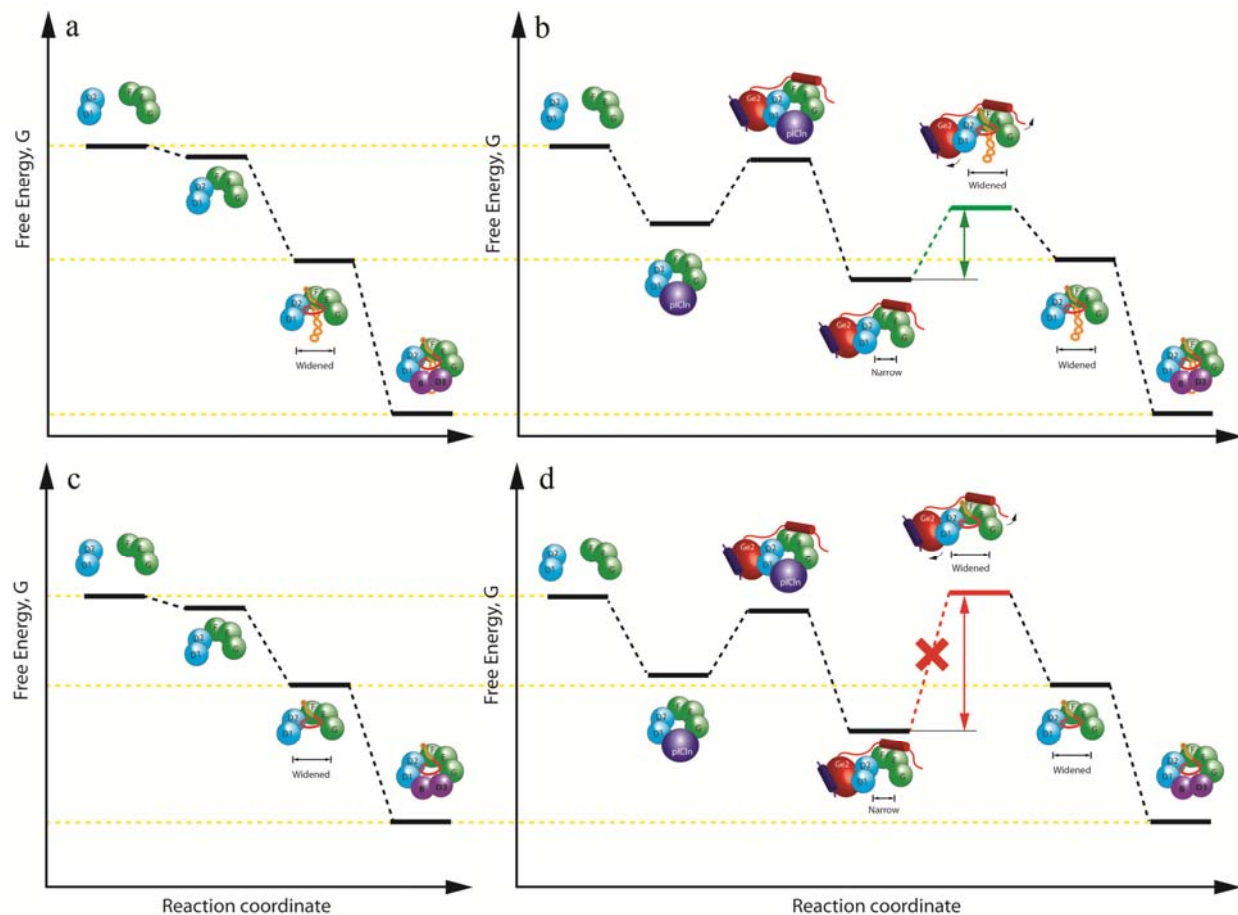

**Fig. S10. Energy diagrams for Sm core assembly.** Sm core assembles on the snRNP code without assembly chaperons, in vitro (a) and with assembly chaperons, in vivo (b), and on the Sm site alone without chaperons, in vitro (c) and with chaperons, in vivo (d).



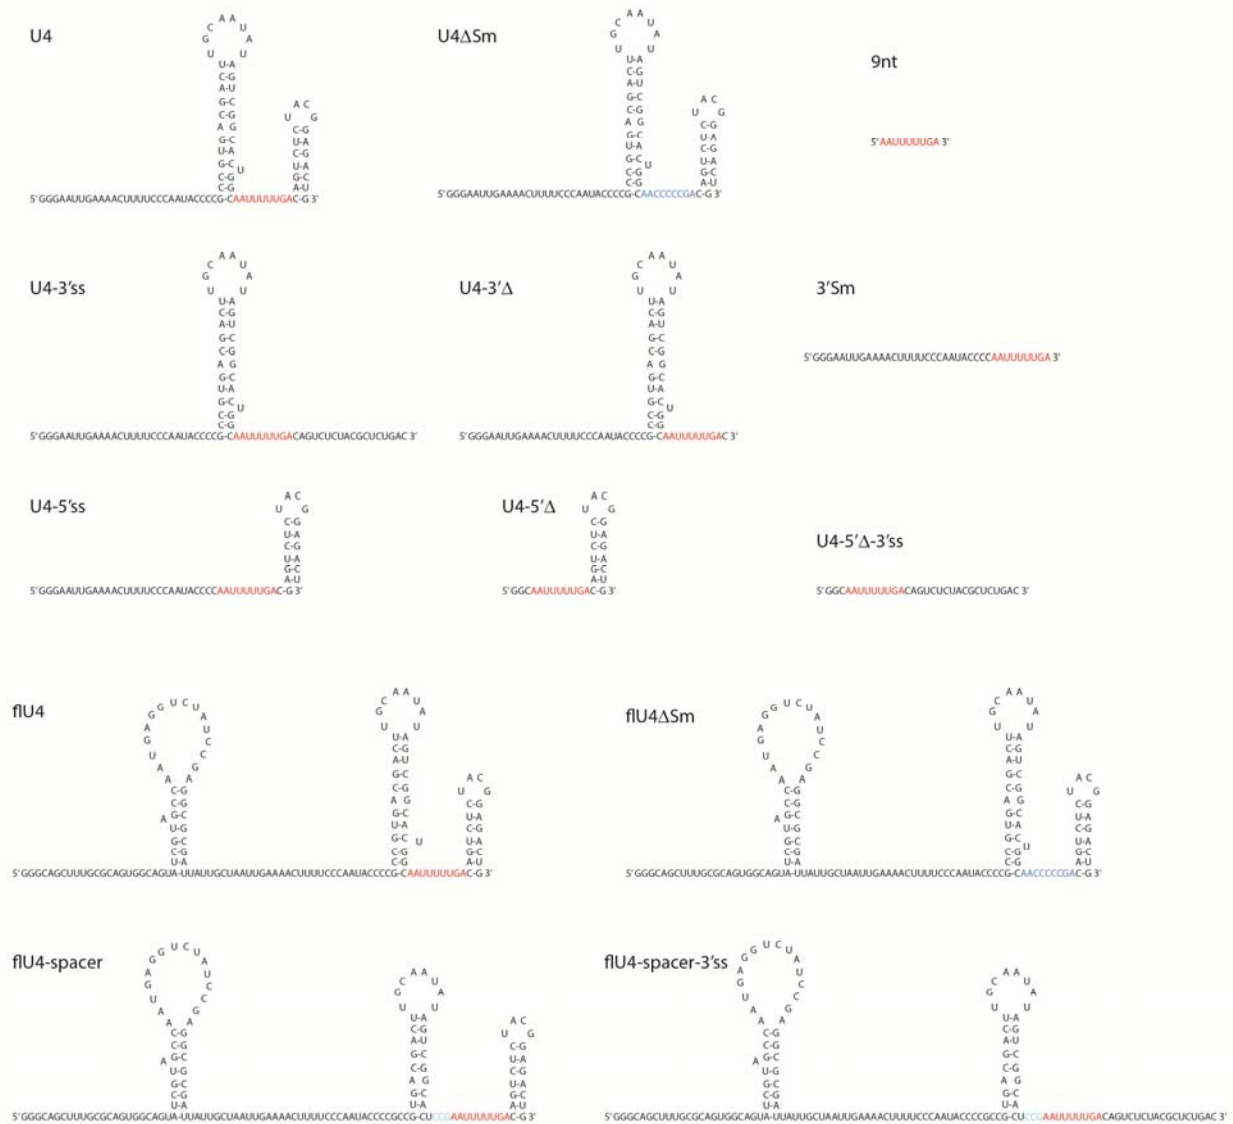

**Fig. S11. The sequences and secondary structures of the RNAs used in this study.** Sm site is colored in red, ΔSm in blue, and the 3nt spacer in cyan (same as in cartoon).
